# Supplementary material
Source: ML conference proceedings conference paper supplement (https://proceedings.mlr.press/v119/raghunathan20a.html)
Supplement: Supplementary file [file raghunathan20a-supp.pdf]

## A. Transformations to handle arbitrary matrix norms

Consider a more general minimum norm estimator of the following form. Given inputs  $X$  and corresponding targets  $y$  as training data, we study the interpolation estimator,

$$\hat{\theta} = \arg \min_{\theta} \left\{ \theta^\top M \theta : X \theta = y \right\}, \quad (12)$$

where  $M$  is a positive definite (PD) matrix that incorporates prior knowledge about the true model. For simplicity, we present our results in terms of the  $\ell_2$  norm (ridgeless regression) as defined in Equation 12. However, all our results hold for arbitrary  $M$ -norms via appropriate rotations. Given an arbitrary PD matrix  $M$ , the rotated covariates  $x \leftarrow M^{-1/2}x$  and rotated parameters  $\theta \leftarrow M^{1/2}\theta$  maintain  $y = X\theta$  and the  $M$ -norm of parameters simplifies to  $\|\theta\|_2$ .

## B. Standard error of minimum norm interpolants

### B.1. Projection operators

The projection operators  $\Pi_{\text{std}}^\perp$  and  $\Pi_{\text{aug}}^\perp$  are formally defined as follows.

$$\Sigma_{\text{std}} = X_{\text{std}}^\top X_{\text{std}}, \quad \Pi_{\text{std}}^\perp = I - \Sigma_{\text{std}}^+ \Sigma_{\text{std}} \quad (13)$$

$$\Sigma_{\text{aug}} = X_{\text{std}}^\top X_{\text{std}} + X_{\text{ext}}^\top X_{\text{ext}}, \quad \Pi_{\text{aug}}^\perp = I - \Sigma_{\text{aug}}^+ \Sigma_{\text{aug}}. \quad (14)$$

### B.2. Invariant transformations may have arbitrary nullspace components

We show that the transformations which satisfy the invariance condition  $(\tilde{x} - x)^\top \theta^* = 0$  where  $\tilde{x} \in T(x)$  is a transformation of  $x$  may have arbitrary nullspace components for general transformation mappings  $T$ . Let  $\Pi_{\text{std}}$  and  $\Pi_{\text{std}}^\perp$  be the column space and nullspace projections for the original data  $X_{\text{std}}$ . The invariance condition is equivalent to

$$(\tilde{x} - x)^\top \theta^* = (\Pi_{\text{std}}(\tilde{x} - x) + \Pi_{\text{std}}^\perp(\tilde{x} - x))^\top \theta^* = 0 \quad (15)$$

which implies that as long as  $\Pi_{\text{std}}^\perp \theta^* \neq 0$ , then for any choice of nullspace component  $\Pi_{\text{std}}^\perp(\tilde{x}) \in \text{Null}(X_{\text{std}}^\top X_{\text{std}})$ , there is a choice of  $\Pi_{\text{std}} \tilde{x}$  which satisfies the condition. Thus, we consider augmented points  $X_{\text{ext}}$  with arbitrary components in the nullspace of  $X_{\text{std}}$ .

### B.3. Proof of Theorem 1

Inequality (8) follows from

$$\begin{aligned} L_{\text{std}}(\hat{\theta}_{\text{aug}}) - L_{\text{std}}(\hat{\theta}_{\text{std}}) &= (\theta^* - \hat{\theta}_{\text{aug}})^\top \Sigma (\theta^* - \hat{\theta}_{\text{aug}}) - (\theta^* - \hat{\theta}_{\text{std}})^\top \Sigma (\theta^* - \hat{\theta}_{\text{std}}) \\ &= (\Pi_{\text{aug}}^\perp \theta^*)^\top \Sigma \Pi_{\text{aug}}^\perp \theta^* - (\Pi_{\text{std}}^\perp \theta^*)^\top \Sigma \Pi_{\text{std}}^\perp \theta^* \\ &= w^\top \Sigma w - (w + v)^\top \Sigma (w + v) \\ &= -2w^\top \Sigma v - v^\top \Sigma v \end{aligned} \quad (16)$$

by decomposition of  $\Pi_{\text{std}}^\perp \theta^* = v + w$  where  $v = \Pi_{\text{std}}^\perp \Pi_{\text{aug}} \theta^*$  and  $w = \Pi_{\text{std}}^\perp \Pi_{\text{aug}}^\perp \theta^*$ . Note that the error difference does scale with  $\|\theta^*\|^2$ , although the sign of the difference does not.

### B.4. Proof of Corollary 1

Corollary 1 presents three sufficient conditions under which the standard error of the augmented estimator  $L_{\text{std}}(\hat{\theta}_{\text{aug}})$  is never larger than the standard error of the standard estimator  $L_{\text{std}}(\hat{\theta}_{\text{std}})$ .

1. When the population covariance  $\Sigma = I$ , from Theorem 1, we see that

$$L_{\text{std}}(\hat{\theta}_{\text{std}}) - L_{\text{std}}(\hat{\theta}_{\text{aug}}) = v^\top v + 2w^\top v = v^\top v \geq 0, \quad (17)$$

since  $v = \Pi_{\text{std}}^\perp \Pi_{\text{aug}} \theta^*$  and  $w = \Pi_{\text{aug}}^\perp \theta^*$  are orthogonal.

2. When  $\Pi_{\text{aug}}^\perp = 0$ , the vector  $w$  in Theorem 1 is 0, and hence we get

$$L_{\text{std}}(\hat{\theta}_{\text{std}}) - L_{\text{std}}(\hat{\theta}_{\text{aug}}) = v^\top v \geq 0. \quad (18)$$

3. We prove the eigenvector condition in Section B.7 which studies the effect of augmenting with a single extra point in general.

### B.5. Proof of Proposition 1

The proof of Proposition 1 is based on the following two lemmas that are also useful for characterization purposes in Corollary 2.

**Lemma 1.** *If a PSD matrix  $\Sigma$  has non-equal eigenvalues, one can find two unit vectors  $w, v$  for which the following holds*

$$w^\top v = 0 \quad \text{and} \quad w^\top \Sigma v \neq 0 \quad (19)$$

Hence, there exists a combination of original and augmentation dataset  $X_{\text{std}}, X_{\text{ext}}$  such that condition (19) holds for two directions  $v \in \text{Col}(\Pi_{\text{std}}^\perp \Pi_{\text{aug}})$  and  $w \in \text{Col}(\Pi_{\text{std}}^\perp \Pi_{\text{aug}}^\perp) = \text{Col}(\Pi_{\text{aug}}^\perp)$ .

Note that neither  $w$  nor  $v$  can be eigenvectors of  $\Sigma$  in order for both conditions in equation (19) to hold. Given a population covariance, fixed original and augmentation data for which condition (19) holds, we can now explicitly construct  $\theta^*$  for which augmentation increases standard error.

**Lemma 2.** *Assume  $\Sigma, X_{\text{std}}, X_{\text{ext}}$  are fixed. Then condition (19) holds for two directions  $v \in \text{Col}(\Pi_{\text{std}}^\perp \Pi_{\text{aug}})$  and  $w \in \text{Col}(\Pi_{\text{std}}^\perp \Pi_{\text{aug}}^\perp)$  iff there exists a  $\theta^*$  such that  $L_{\text{std}}(\hat{\theta}_{\text{aug}}) - L_{\text{std}}(\hat{\theta}_{\text{std}}) \geq c$  for some  $c > 0$ . Furthermore, the  $\ell_2$  norm of  $\theta^*$  needs to satisfy the following lower bounds with  $c_1 := \|\hat{\theta}_{\text{aug}}\|^2 - \|\hat{\theta}_{\text{std}}\|^2$*

$$\begin{aligned} \|\theta^*\|^2 - \|\hat{\theta}_{\text{aug}}\|^2 &\geq \beta_1 c_1 + \beta_2 \frac{c^2}{c_1} \\ \|\theta^*\|^2 - \|\hat{\theta}_{\text{std}}\|^2 &\geq (\beta_1 + 1)c_1 + \beta_2 \frac{c^2}{c_1} \end{aligned} \quad (20)$$

where  $\beta_i$  are constants that depend on  $X_{\text{std}}, X_{\text{ext}}, \Sigma$ .

Proposition 1 follows directly from the second statement of Lemma 2 by minimizing the bound (20) with respect to  $c_1$  which is a free parameter to be chosen during construction of  $\theta^*$  (see proof of Lemma (2)). The minimum is attained for  $c_1 = 2\sqrt{(\beta_1 + 1)(\beta_2 c^2)}$ . We hence conclude that  $\theta^*$  needs to be sufficiently more complex than a good standard solution, i.e.  $\|\theta^*\|_2^2 - \|\hat{\theta}_{\text{std}}\|_2^2 > \gamma c$  where  $\gamma > 0$  is a constant that depends on the  $X_{\text{std}}, X_{\text{ext}}$ .

### B.6. Proof of technical lemmas

In this section we prove the technical lemmas that are used to prove Theorem 1.

#### B.6.1. PROOF OF LEMMA 2

Any vector  $\Pi_{\text{std}}^\perp \theta \in \text{Null}(\Sigma_{\text{std}})$  can be decomposed into orthogonal components  $\Pi_{\text{std}}^\perp \theta = \Pi_{\text{std}}^\perp \Pi_{\text{aug}}^\perp \theta + \Pi_{\text{std}}^\perp \Pi_{\text{aug}} \theta$ . Using the minimum-norm property, we can then always decompose the (rotated) augmented estimator  $\hat{\theta}_{\text{aug}} \in \text{Col}(\Pi_{\text{aug}}^\perp) = \text{Col}(\Pi_{\text{std}}^\perp \Pi_{\text{aug}}^\perp)$  and true parameter  $\theta^*$  by

$$\begin{aligned} \hat{\theta}_{\text{aug}} &= \hat{\theta}_{\text{std}} + \sum_{v_i \in \text{ext}} \zeta_i v_i \\ \theta^* &= \hat{\theta}_{\text{aug}} + \sum_{w_j \in \text{rest}} \xi_j w_j, \end{aligned}$$

where we define “ext” as the set of basis vectors which span  $\text{Col}(\Pi_{\text{std}}^\perp \Pi_{\text{aug}})$  and respectively “rest” for  $\text{Null}(\Sigma_{\text{aug}})$ . Requiring the standard error increase to be some constant  $c > 0$  can be rewritten using identity (16) as follows

$$\begin{aligned}
 & L_{\text{std}}(\hat{\theta}_{\text{aug}}) - L_{\text{std}}(\hat{\theta}_{\text{std}}) = c \\
 \iff & \left( \sum_{v_i \in \text{ext}} \zeta_i v_i \right)^\top \Sigma \left( \sum_{v_i \in \text{ext}} \zeta_i v_i \right) + c = -2 \left( \sum_{w_j \in \text{rest}} \xi_j w_j \right) \Sigma \left( \sum_{v_i \in \text{ext}} \zeta_i v_i \right) \\
 \iff & \left( \sum_{v_i \in \text{ext}} \zeta_i v_i \right)^\top \Sigma \left( \sum_{v_i \in \text{ext}} \zeta_i v_i \right) + c = -2 \sum_{w_j \in \text{rest}, v_i \in \text{ext}} \xi_j \zeta_i w_j^\top \Sigma v_i
 \end{aligned} \tag{21}$$

The left hand side of equation (21) is always positive, hence it is necessary for this equality to hold with any  $c > 0$ , that there exists at least one pair  $i, j$  such that  $w_j^\top \Sigma v_i \neq 0$  and one direction of the iff statement is proved.

For the other direction, we show that if there exist  $v \in \text{Col}(\Pi_{\text{std}}^\perp \Pi_{\text{aug}})$  and  $w \in \text{Col}(\Pi_{\text{std}}^\perp \Pi_{\text{aug}}^\perp)$  for which condition (19) holds (wlog we assume that the  $w^\top \Sigma v < 0$ ) we can construct a  $\theta^*$  for which the inequality (8) in Theorem 1 holds as follows:

It is then necessary by our assumption that  $\xi_j \zeta_i w_j^\top \Sigma v_i > 0$  for at least some  $i, j$ . We can then set  $\zeta_i > 0$  such that  $\|\hat{\theta}_{\text{aug}} - \hat{\theta}_{\text{std}}\|^2 = \|\zeta\|^2 = c_1 > 0$ , i.e. that the augmented estimator is not equal to the standard estimator (else obviously there can be no difference in error and equality (21) cannot be satisfied for any desired error increase  $c > 0$ ).

The choice of  $\xi$  minimizing  $\|\theta^* - \hat{\theta}_{\text{aug}}\|^2 = \sum_j \xi_j^2$  that also satisfies equation (21) is an appropriately scaled vector in the direction of  $x = W^\top \Sigma V \zeta$  where we define  $W := [w_1, \dots, w_{|\text{rest}|}]$  and  $V := [v_1, \dots, v_{|\text{ext}|}]$ . Defining  $c_0 = \zeta^\top V^\top \Sigma V \zeta$  for convenience and then setting

$$\xi = -\frac{c_0 + c}{2\|x\|_2^2} x \tag{22}$$

which is well-defined since  $x \neq 0$ , yields a  $\theta^*$  such that augmentation increases standard error. It is thus necessary for  $L_{\text{std}}(\hat{\theta}_{\text{aug}}) - L_{\text{std}}(\hat{\theta}_{\text{std}}) = c$  that

$$\begin{aligned}
 \sum_j \xi_j^2 &= \frac{(c_0 + c)^2}{4\|W^\top \Sigma V \zeta\|^2} = \frac{(\zeta^\top V^\top \Sigma V \zeta + c)^2}{4\zeta^\top V^\top \Sigma W W^\top \Sigma V \zeta} \\
 &\geq \frac{(\zeta^\top V^\top \Sigma V \zeta)^2}{4\zeta^\top V^\top \Sigma W W^\top \Sigma V \zeta} + \frac{c^2}{4\zeta^\top V^\top \Sigma W W^\top \Sigma V \zeta} \\
 &\geq \frac{c_1 \lambda_{\min}^2(V^\top \Sigma V)}{4 \lambda_{\max}^2(W^\top \Sigma V)} + \frac{c^2}{4c_1 \lambda_{\max}^2(W^\top \Sigma V)}.
 \end{aligned}$$

By assuming existence of  $i, j$  such that  $\xi_j \zeta_i w_j^\top \Sigma v_i \neq 0$ , we are guaranteed that  $\lambda_{\max}^2(W^\top \Sigma V) > 0$ .

Note due to construction we have  $\|\theta^*\|_2^2 = \|\hat{\theta}_{\text{std}}\|_2^2 + \sum_i \zeta_i^2 + \sum_j \xi_j^2$  and plugging in the choice of  $\xi_j$  in equation (22) we have

$$\|\theta^*\|_2^2 - \|\hat{\theta}_{\text{std}}\|_2^2 \geq c_1 \left[ 1 + \frac{\lambda_{\min}^2(V^\top \Sigma V)}{4\lambda_{\max}^2(W^\top \Sigma V)} \right] + \frac{c^2}{4\lambda_{\max}^2(W^\top \Sigma V)} \frac{1}{c_1}.$$

Setting  $\beta_1 = \left[ 1 + \frac{\lambda_{\min}^2(V^\top \Sigma V)}{4\lambda_{\max}^2(W^\top \Sigma V)} \right]$ ,  $\beta_2 = \frac{1}{4\lambda_{\max}^2(W^\top \Sigma V)}$  yields the result.

### B.6.2. PROOF OF LEMMA 1

Let  $\lambda_1, \dots, \lambda_m$  be the  $m$  non-zero eigenvalues of  $\Sigma$  and  $u_i$  be the corresponding eigenvectors. Then choose  $v$  to be any combination of the eigenvectors  $v = U\beta$  where  $U = [u_1, \dots, u_m]$  where at least  $\beta_i, \beta_j \neq 0$  for  $\lambda_i \neq \lambda_j$ . We next construct  $w = U\alpha$  by choosing  $\alpha$  as follows such that the inequality in (19) holds:

$$\begin{aligned}
 \alpha_i &= \frac{\beta_j}{\beta_i^2 + \beta_j^2} \\
 \alpha_j &= \frac{-\beta_i}{\beta_i^2 + \beta_j^2}
 \end{aligned}$$

and  $\alpha_k = 0$  for  $k \neq i, j$ . Then we have that  $\alpha^\top \beta = 0$  and hence  $w^\top v = 0$ . Simultaneously

$$\begin{aligned} w^\top \Sigma v &= \lambda_i \beta_i \alpha_i + \lambda_j \beta_j \alpha_j \\ &= (\lambda_i - \lambda_j) \frac{\beta_i \beta_j}{\beta_i^2 + \beta_j^2} \neq 0 \end{aligned}$$

which concludes the proof of the first statement.

We now prove the second statement by constructing  $\Sigma_{\text{std}} = X_{\text{std}}^\top X_{\text{std}}$ ,  $\Sigma_{\text{ext}} = X_{\text{ext}}^\top X_{\text{ext}}$  using  $w, v$ . We can then obtain  $X_{\text{std}}, X_{\text{ext}}$  using any standard decomposition method to obtain  $X_{\text{std}}, X_{\text{ext}}$ . We construct  $\Sigma_{\text{std}}, \Sigma_{\text{ext}}$  using  $w, v$ . Without loss of generality, we can make them simultaneously diagonalizable. We construct a set of eigenvectors that is the same for both matrices paired with different eigenvalues. Let the shared eigenvectors include  $w, v$ . Then if we set the corresponding eigenvalues  $\lambda_w(\Sigma_{\text{ext}}) = 0, \lambda_v(\Sigma_{\text{ext}}) > 0$  and  $\lambda_w(\Sigma_{\text{std}}) = 0, \lambda_v(\Sigma_{\text{std}}) = 0$ , then  $\lambda_w(\Sigma_{\text{aug}}) = 0$  such that  $w \in \text{Col}(\Pi_{\text{std}}^\perp \Pi_{\text{aug}}^\perp)$  and  $v \in \text{Col}(\Pi_{\text{std}}^\perp \Pi_{\text{aug}})$ . This shows the second statement. With this, we can design a  $\theta^*$  for which augmentation increases standard error as in Lemma 2.

## B.7. Characterization Corollary 2

A simpler case to analyze is when we only augment with one extra data point. The following corollary characterizes which single augmentation directions lead to higher prediction error for the augmented estimator.

**Corollary 2.** *The following characterizations hold for augmentation directions that do not cause the standard error of the augmented estimator to be higher than the original estimator.*

- (a) (in terms of ratios of inner products) *For a given  $\theta^*$ , data augmentation does not increase the standard error of the augmented estimator for a single augmentation direction  $x_{\text{ext}}$  if*

$$\frac{x_{\text{ext}}^\top \Pi_{\text{std}}^\perp \Sigma \Pi_{\text{std}}^\perp x_{\text{ext}}}{x_{\text{ext}}^\top \Pi_{\text{std}}^\perp x_{\text{ext}}} - 2 \frac{(\Pi_{\text{std}}^\perp x_{\text{ext}})^\top \Sigma \Pi_{\text{std}}^\perp \theta^*}{x_{\text{ext}}^\top \Pi_{\text{std}}^\perp \theta^*} \leq 0 \quad (23)$$

- (b) (in terms of eigenvectors) *Data augmentation does not increase standard error for any  $\theta^*$  if  $\Pi_{\text{std}}^\perp x_{\text{ext}}$  is an eigenvector of  $\Sigma$ . However if one augments in the direction of a mixture of eigenvectors of  $\Sigma$  with different eigenvalues, there exists  $\theta^*$  such that augmentation increases standard error.*

- (c) (depending on well-conditioning of  $\Sigma$ ) *If  $\frac{\lambda_{\max}(\Sigma)}{\lambda_{\min}(\Sigma)} \leq 2$  and  $\Pi_{\text{std}}^\perp \theta^*$  is an eigenvector of  $\Sigma$ , then no augmentations  $x_{\text{ext}}$  increase standard error.*

The form in Equation (23) compares ratios of inner products of  $\Pi_{\text{std}}^\perp x_{\text{ext}}$  and  $\Pi_{\text{std}}^\perp \theta^*$  in two spaces: the one in the numerator is weighted by  $\Sigma$  whereas the denominator is the standard inner product. Thus, if  $\Sigma$  scales and rotates rather inhomogeneously, then augmenting with  $x_{\text{ext}}$  may hurt standard error. Here again, if  $\Sigma = \gamma I$  for  $\gamma > 0$ , then the condition must hold.

### B.7.1. PROOF OF COROLLARY 2 (A)

Note that for a single augmentation point  $X_{\text{ext}} = x_{\text{ext}}^\top$ , the orthogonal decomposition of  $\Pi_{\text{std}}^\perp \theta^*$  into  $\text{Col}(\Pi_{\text{aug}}^\perp)$  and  $\text{Col}(\Pi_{\text{std}}^\perp \Pi_{\text{aug}})$  is defined by  $v = \frac{\Pi_{\text{std}}^\perp x_{\text{ext}}^\top \theta^*}{\|\Pi_{\text{std}}^\perp x_{\text{ext}}\|^2} \Pi_{\text{std}}^\perp x_{\text{ext}}$  and  $w = \Pi_{\text{std}}^\perp \theta^* - v$  respectively. Plugging back into identity (16) then yields the following condition for safe augmentations:

$$\begin{aligned} 2(v - \Pi_{\text{std}}^\perp \theta^*)^\top \Sigma v - v^\top \Sigma v &\leq 0 \\ v^\top \Sigma v - 2(\Pi_{\text{std}}^\perp \theta^*)^\top \Sigma v &\leq 0 \\ \iff \Pi_{\text{std}}^\perp x_{\text{ext}}^\top \Sigma \Pi_{\text{std}}^\perp x_{\text{ext}} &\leq 2(\Pi_{\text{std}}^\perp \theta^*)^\top \Sigma \Pi_{\text{std}}^\perp x_{\text{ext}} \cdot \frac{\|\Pi_{\text{std}}^\perp x_{\text{ext}}\|^2}{\Pi_{\text{std}}^\perp x_{\text{ext}}^\top \theta^*} \end{aligned} \quad (24)$$

Rearranging the terms yields inequality (23).

Safe augmentation directions for specific choices of  $\theta^*$  and  $\Sigma$  are illustrated in Figure 3.

### B.7.2. PROOF OF COROLLARY 2 (B)

Assume that  $\Pi_{\text{std}}^\perp x_{\text{ext}}$  is an eigenvector of  $\Sigma$  with eigenvalue  $\lambda > 0$ . We have

$$\frac{x_{\text{ext}}^\top \Pi_{\text{std}}^\perp \Sigma \Pi_{\text{std}}^\perp x_{\text{ext}}}{x_{\text{ext}}^\top \Pi_{\text{std}}^\perp x_{\text{ext}}} - 2 \frac{(\Pi_{\text{std}}^\perp x_{\text{ext}})^\top \Sigma \Pi_{\text{std}}^\perp \theta^*}{x_{\text{ext}}^\top \Pi_{\text{std}}^\perp \theta^*} = -\lambda < 0$$

for any  $\theta^*$ . Hence by Corollary 2 (a), the standard error doesn't increase by augmenting with eigenvectors of  $\Sigma$  for any  $\theta^*$ .

When the single augmentation direction  $v$  is not an eigenvector of  $\Sigma$ , by Lemma 1 one can find  $w$  such that  $w^\top \Sigma v \neq 0$ . The proof in Lemma 1 gives an explicit construction for  $w$  such that condition (19) holds and the result then follows directly by Lemma 2.

### B.7.3. PROOF OF COROLLARY 2 (C)

Suppose  $\Sigma \Pi_{\text{std}}^\perp \theta^* = \lambda \Pi_{\text{std}}^\perp \theta^*$  for some  $\lambda_{\min}(\Sigma) \leq \lambda \leq \lambda_{\max}(\Sigma)$ . Then starting with the expression (23),

$$\begin{aligned} \frac{x_{\text{ext}}^\top \Pi_{\text{std}}^\perp \Sigma \Pi_{\text{std}}^\perp x_{\text{ext}}}{x_{\text{ext}}^\top \Pi_{\text{std}}^\perp x_{\text{ext}}} - 2 \frac{(\Pi_{\text{std}}^\perp x_{\text{ext}})^\top \Sigma \Pi_{\text{std}}^\perp \theta^*}{x_{\text{ext}}^\top \Pi_{\text{std}}^\perp \theta^*} &= \frac{x_{\text{ext}}^\top \Pi_{\text{std}}^\perp \Sigma \Pi_{\text{std}}^\perp x_{\text{ext}}}{x_{\text{ext}}^\top \Pi_{\text{std}}^\perp x_{\text{ext}}} - 2\lambda \\ &\leq \lambda_{\max}(\Sigma) - 2\lambda < 0 \end{aligned}$$

by applying  $\frac{\lambda_{\max}(\Sigma)}{\lambda_{\min}(\Sigma)} \leq 2$ . Thus when  $\Pi_{\text{std}}^\perp \theta^*$  is an eigenvector of  $\Sigma$ , there are no augmentations  $x_{\text{ext}}$  that increase the standard error.

## C. Details for spline staircase

We describe the data distribution, augmentations, and model details for the spline experiment in Figure 1 and toy scenario in Figure 2. Finally, we show that we can construct a simplified family of spline problems where the ratio between standard errors of the augmented and standard estimators increases unboundedly as the number of stairs.

### C.1. True model

We consider a finite input domain

$$\mathcal{T} = \{0, \epsilon, 1, 1 + \epsilon, \dots, s - 1, s - 1 + \epsilon\} \quad (25)$$

for some integer  $s$  corresponding to the total number of ‘‘stairs’’ in the staircase problem. Let  $\mathcal{T}_{\text{line}} \subset \mathcal{T} = \{0, 1, \dots, s - 1\}$ . We define the underlying function  $f^* : \mathbb{R} \mapsto \mathbb{R}$  as  $f^*(t) = \lfloor t \rfloor$ . This function takes a staircase shape, and is linear when restricted to  $\mathcal{T}_{\text{line}}$ .

**Sampling training data  $X_{\text{std}}$**  We describe the data distribution in terms of the one-dimensional input  $t$ , and by the one-to-one correspondence with spline basis features  $x = X(t)$ , this also defines the distribution of spline features  $x \in \mathcal{X}$ . Let  $w \in \Delta_s$  define a distribution over  $\mathcal{T}_{\text{line}}$  where  $\Delta_s$  is the probability simplex of dimension  $s$ . We define the data distribution with the following generative process for one sample  $t$ . First, sample a point  $i$  from  $\mathcal{T}_{\text{line}}$  according to the categorical distribution described by  $w$ , such that  $i \sim \text{Categorical}(w)$ . Second, sample  $t$  by perturbing  $i$  with probability  $\delta$  such that

$$t = \begin{cases} i & \text{w.p. } 1 - \delta \\ i + \epsilon & \text{w.p. } \delta. \end{cases}$$

The sampled  $t$  is in  $\mathcal{T}_{\text{line}}$  with probability  $1 - \delta$  and  $\mathcal{T}_{\text{line}}^c$  with probability  $\delta$ , where we choose  $\delta$  to be small.

**Sampling augmented points  $X_{\text{ext}}$**  For each element  $t_i$  in the training set, we augment with  $\tilde{T}_i = [\tilde{u} \stackrel{u.a.r.}{\sim} B(t_i)]$ , an input chosen uniformly at random from  $B(t_i) = \{[t_i], [t_i] + \epsilon\}$ . Recall that in our work, we consider data augmentation where the targets associated with the augmented points are from the ground truth oracle. Notice that by definition,  $f^*(\tilde{t}_i) = f^*(t_i)$  for all  $\tilde{t}_i \in B(t_i)$ , and thus we can set the augmented targets to be  $\tilde{y}_i = y_i$ . This is similar to random data augmentation in images (Yaeger et al., 1996; Krizhevsky et al., 2012), where inputs are perturbed in a way that preserves the label.

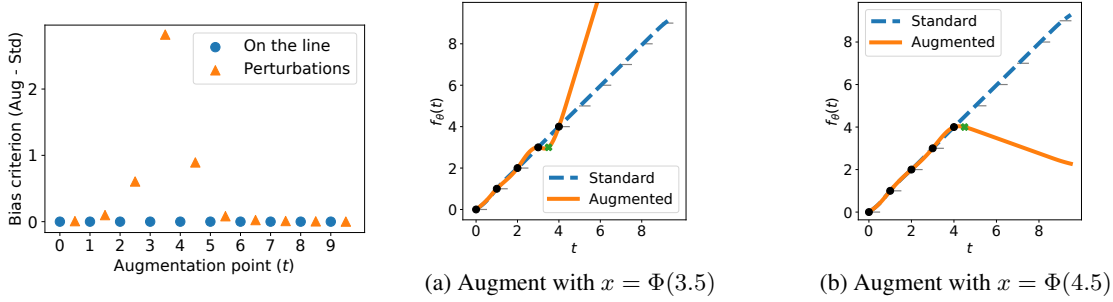

Figure 7. Visualization of the effect of single augmentation points in the noiseless spline problem given an initial dataset  $X_{\text{std}} = \{\Phi(t) : t \in \{0, 1, 2, 3, 4\}\}$ . The standard estimator defined by  $X_{\text{std}}$  is linear. **(a)** Plot of the difference term in Corollary 2 (a), is positive when augmenting a single point causes higher test error. Augmenting with points on  $\mathcal{X}_{\text{line}}$  does not affect the bias, but augmenting with any element of  $\{X(t) : t \in \{2.5, 3.5, 4.5\}\}$  hurts the bias of the augmented estimator dramatically. **(b), (c)** Augmenting with  $X(3.5)$  or  $X(4.5)$  hurts the bias by changing the direction of extrapolation.

## C.2. Spline model

We parameterize the spline predictors as  $f_{\theta}(t) = \theta^{\top} X(t)$  where  $X : \mathbb{R} \rightarrow \mathbb{R}^d$  is the cubic B-spline feature mapping (Friedman et al., 2001) and the norm of  $f_{\theta}(t)$  can be expressed as  $\theta^{\top} M \theta$  for a matrix  $M$  that penalizes a large second derivative norm where  $[M]_{ij} = \int X_i''(u) X_j''(u) du$ . Notice that the splines problem is a linear regression problem from  $\mathbb{R}^d$  to  $\mathbb{R}$  in the feature domain  $X(t)$ , allowing direct application of Theorem 1. As a linear regression problem, we define the finite domain as  $\mathcal{X} = \{X(t) : t \in \mathcal{T}\}$  containing  $2s$  elements in  $\mathbb{R}^d$ . There is a one-to-one correspondence between  $t$  and  $X(t)$ , such that  $X^{-1}$  is well-defined. We define the features that correspond to inputs in  $\mathcal{T}_{\text{line}}$  as  $\mathcal{X}_{\text{line}} = \{x : X^{-1}(x) \in \mathcal{T}_{\text{line}}\}$ . Using this feature mapping, there exists a  $\theta^*$  such that  $f_{\theta^*}(t) = f^*(t)$  for  $t \in \mathcal{T}$ .

Our hypothesis class is the family of cubic B-splines as defined in (Friedman et al., 2001). Cubic B-splines are piecewise cubic functions, where the endpoints of each cubic function are called the knots. In our example, we fix the knots to be  $[0, \epsilon, 1, \dots, s-1, s-1+\epsilon]$ , which places a knot on every point in  $\mathcal{T}$ . This ensures that the function class contains an interpolating function on all  $t \in \mathcal{T}$ , i.e. for some  $\theta^*$ ,

$$f_{\theta^*}(t) = \theta^{*\top} X(t) = f^*(t) = \lfloor t \rfloor.$$

We solve the minimum norm problem

$$\hat{\theta}_{\text{std}} = \arg \min_{\theta} \{\theta^{\top} M \theta : X_{\text{std}} \theta = y_{\text{std}}\} \quad (26)$$

for the standard estimator and the corresponding augmented problem to obtain the augmented estimator.

## C.3. Evaluating Corollary 2 (a) for splines

We now illustrate the characterization for the effect of augmentation with different single points in Theorem 2 (a) on the splines problem. We assume the domain to  $\mathcal{T}$  as defined in equation 25 with  $s = 10$  and our training data to be  $X_{\text{std}} = \{X(t) : t \in \{0, 1, 2, 3, 4\}\}$ . Let *local* perturbations be spline features for  $\tilde{t} \notin \mathcal{T}_{\text{line}}$  where  $\tilde{t} = t + \epsilon$  is  $\epsilon$  away from some  $t \in \{0, 1, 2, 3, 4\}$  from the training set. We examine all possible single augmentation points in Figure 7 (a) and plot the calculated standard error difference as defined in equation (24). Figure 7 shows that augmenting with an additional point from  $\{X(t) : t \in \mathcal{T}_{\text{line}}\}$  does not affect the bias, but adding any perturbation point in  $\{X(\tilde{t}) : \tilde{t} \in \{2.5, 3.5, 4.5\}\}$  where  $\tilde{t} \notin \mathcal{T}_{\text{line}}$  increases the error significantly by changing the direction in which the estimator extrapolates. Particularly, *local* augmentations near the boundary of the original dataset hurt the most while other augmentations do not significantly affect the bias of the augmented estimator.

### C.3.1. LOCAL AND GLOBAL STRUCTURE IN THE SPLINE STAIRCASE

In the spline staircase, the local perturbations can be thought of as fitting high frequency noise in the function space, where fitting them causes a global change in the function.

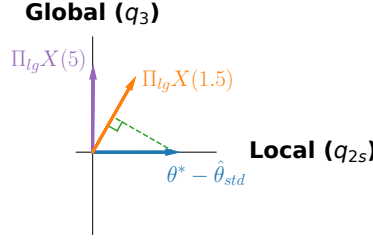

Figure 8. Nullspace projections onto global direction  $q_3$  and local direction  $q_{2s}$  in  $\text{Null}(\Sigma)$  via  $\Pi_{\text{Ig}}$ , representing global and local eigenvectors respectively. The local perturbation  $\Pi_{\text{Ig}}\hat{\Phi}(1.5)$  has both local and global components, creating a high-error component in the global direction.

To see this, we transform the problem to minimum  $\ell_2$  norm linear interpolation using features  $X_M(t) = X(t)M^{-1/2}$  so that the results from Section 3.2 apply directly. Let  $\Sigma$  be the population covariance of  $X_M$  for a uniform distribution over the discrete domain consisting of  $s$  stairs and their perturbations (Figure 2). Let  $Q = [q_i]_{i=1}^{2s}$  be the eigenvectors of  $\Sigma$  in decreasing order of their corresponding eigenvalues. The visualization in Figure 4 shows that  $q_i$  are wave functions in the original input space; the “frequency” of the wave increases as  $i$  increases.

Suppose the original training set consists of two points,  $X_{\text{std}} = [X_M(0), X_M(1)]^\top$ . We study the effect of augmenting point  $x_{\text{ext}}$  in terms of  $q_i$  above. First, we find that the first two eigenvectors corresponding to linear functions satisfy  $\Pi_{\text{std}}^\perp q_1 = \Pi_{\text{std}}^\perp q_2 = 0$ . Intuitively, this is because the standard estimator is linear. For ease of visualization, we consider the 2D space in  $\text{Null}(\Sigma)$  spanned by  $\Pi_{\text{std}}^\perp q_3$  (global direction, low frequency) and  $\Pi_{\text{std}}^\perp q_{2s}$  (local direction, high frequency). The matrix  $\Pi_{\text{Ig}} = [\Pi_{\text{std}}^\perp q_3, \Pi_{\text{std}}^\perp q_{2s}]^\top$  projects onto this space. Note that the same results hold when projecting onto all  $\Pi_{\text{std}}^\perp q_i$  in  $\text{Null}(\Sigma)$ .

In terms of the simple 3-D example in Section 3.1, the global direction corresponds to the costly direction with large eigenvalue, as changes in global structure heavily affect the standard error. Figure 8 plots the projections  $\Pi_{\text{Ig}}\theta^*$  and  $\Pi_{\text{Ig}}x_{\text{ext}}$  for different  $x_{\text{ext}}$ . When  $\theta^*$  has high frequency variations and is complex,  $\Pi_{\text{Ig}}\theta^* = (\theta^* - \hat{\theta}_{\text{std}})$  is aligned with the local dimension. For  $x_{\text{ext}}$  immediately local to training points, the projection  $\Pi_{\text{Ig}}x_{\text{ext}}$  (orange vector in Figure 8) has both local and global components. Augmenting these local perturbations introduces error in the global component. For other  $x_{\text{ext}}$  farther from training points,  $\Pi_{\text{Ig}}x_{\text{ext}}$  (blue vector in Figure 8) is almost entirely global and perpendicular to  $\theta^* - \hat{\theta}_{\text{std}}$ , leaving bias unchanged. Thus, augmenting data close to original data cause estimators to fit local components at the cost of the costly global component which changes overall structure of the predictor like in Figure 2(middle). The choice of inductive bias in the  $M$ -norm being minimized results in eigenvectors of  $\Sigma$  that correspond to local and global components, dictating this tradeoff.

#### C.4. Data augmentation can be quite painful for splines

We construct a family of spline problems such that as the number the augmented estimator has much higher error than the standard estimator. We assume that our predictors are from the full family of cubic splines.

**Sampling distribution.** We define a modified domain with continuous intervals  $\mathcal{T} = \cup_{t=0}^{s-1} [t, t + \epsilon]$ . Considering only  $s$  which is a multiple of 2, we sample the original data set as described in Section C.1 with the following probability mass  $w$ :

$$w(t) = \begin{cases} \frac{1-\gamma}{s/2} & t < s/2, t \in \mathcal{T}_{\text{line}} \\ \frac{\gamma}{s/2} & t \geq s/2, t \in \mathcal{T}_{\text{line}} \end{cases} \quad (27)$$

for  $\gamma \in [0, 1)$ . We define a probability distribution  $P_{\mathcal{T}}$  on  $\mathcal{T}$  for a random variable  $T$  by setting  $T = Z + S(Z)$  where  $Z \sim \text{Categorical}(w)$  and the  $Z$ -dependent perturbation  $S(z)$  is defined as

$$S(z) \sim \begin{cases} \text{Uniform}([z, z + \epsilon]) & \text{w.p. } \delta \\ z, & \text{w.p. } 1 - \delta \end{cases} \quad (28)$$

We obtain the training dataset  $X_{\text{std}} = \{X(t_1), \dots, X(t_n)\}$  by sampling  $t_i \sim P_{\mathcal{T}}$ .

**Augmenting with an interval.** Consider a modified augmented estimator for the splines problem, where for each point  $t_i$  we augment with the entire interval  $[[t_i], [t_i] + \epsilon]$  with  $\epsilon \in [0, 1/2)$  and the estimator is enforced to output  $f_{\hat{\theta}}(x) = y_i = \lfloor t_i \rfloor$  for all  $x$  in the interval  $[[t_i], [t_i] + \epsilon]$ . Additionally, suppose that the ratio  $s/n = O(1)$  between the number of stairs  $s$  and the number of samples  $n$  is constant.

In this simplified setting, we can show that the standard error of the augmented estimator grows while the standard error of the standard estimator decays to 0.

**Theorem 3.** *Let the setting be defined as above. Then with the choice of  $\delta = \frac{\log(s^7) - \log(s^7 - 1)}{s}$  and  $\gamma = c/s$  for a constant  $c \in [0, 1)$ , the ratio between standard errors is lower bounded as*

$$\frac{R(\hat{\theta}_{\text{aug}})}{R(\hat{\theta}_{\text{std}})} = \Omega(s^2) \quad (29)$$

which goes to infinity as  $s \rightarrow \infty$ . Furthermore,  $R(\hat{\theta}_{\text{std}}) \rightarrow 0$  as  $s \rightarrow \infty$ .

*Proof.* We first lower bound the standard error of the augmented estimator. Define  $E_1$  as the event that only the lower half of the stairs is sampled, i.e.  $\{t : t < s/2\}$ , which occurs with probability  $(1 - \gamma)^n$ . Let  $t^* = \max_i \lfloor t_i \rfloor$  be the largest ‘‘stair’’ value seen in the training set. Note that the min-norm augmented estimator will extrapolate with zero derivative for  $t \geq \max_i \lfloor t_i \rfloor$ . This is because on the interval  $[t^*, t^* + \epsilon]$ , the augmented estimator is forced to have zero derivative, and the solution minimizing the second derivative of the prediction continues with zero derivative for all  $t \geq t^*$ . In the event  $E_1$ ,  $t^* \leq s/2 - 1$ , where  $t^* = s/2 - 1$  achieves the lowest error in this event. As a result, on the points in the second half of the staircase, i.e.  $t = \{t \in \mathcal{T} : t > \frac{s}{2} - 1\}$ , the augmented estimator incurs large error:

$$\begin{aligned} R(\hat{\theta}_{\text{aug}} | E_1) &\geq \sum_{t=s/2}^s (t - (s/2 - 1))^2 \cdot \frac{\gamma}{s/2} \\ &= \sum_{t=1}^{s/2} t^2 \cdot \frac{\gamma}{s/2} = \frac{\gamma}{6}(s^2 + 2s + 1). \end{aligned}$$

Therefore the standard error of the augmented estimator is bounded by

$$\begin{aligned} R(\hat{\theta}_{\text{aug}}) &\geq R(\hat{\theta}_{\text{aug}} | E_1)P(E_1) = \frac{\gamma}{6}(s^2 + 2s + 1)(1 - \gamma)^n \\ &\geq \frac{1}{6}\gamma(1 - \gamma n)(s^2 + 2s + 1) \\ &= \Omega\left(\frac{c - c^2}{s}(s^2 + 2s + 1)\right) = \Omega(s) \end{aligned}$$

where in the first line, we note that the error on each interval is the same and the probability of each interval is  $(1 - \delta) \frac{\gamma}{s/2} + \epsilon \frac{\delta}{\epsilon} \cdot \frac{\gamma}{s/2} = \frac{\gamma}{s/2}$ .

Next we upper bound the standard error of the standard estimator. Define  $E_2$  to be the event where all points are sampled from  $\mathcal{T}_{\text{line}}$ , which occurs with probability  $(1 - \delta)^n$ . In this case, the standard estimator is linear and fits the points on  $\mathcal{T}_{\text{line}}$  with zero error, while incurring error for all points not in  $\mathcal{T}_{\text{line}}$ . Note that the probability density of sampling a point not in  $\mathcal{T}_{\text{line}}$  is either  $\frac{\delta}{\epsilon} \cdot \frac{1 - \gamma}{s/2}$  or  $\frac{\delta}{\epsilon} \cdot \frac{\gamma}{s/2}$ , which we upper bound as  $\frac{\delta}{\epsilon} \cdot \frac{1}{s/2}$ .

$$\begin{aligned} R(\hat{\theta}_{\text{std}} | E_2) &= \sum_{t=1}^{s-1} \frac{\delta}{\epsilon} \cdot \frac{1}{s/2} \int_0^\epsilon u^2 du = \frac{\delta}{\epsilon} \cdot \frac{1}{s/2} O(\epsilon^3) \\ &= O(\delta) \end{aligned}$$



Therefore for event  $E_2$ , the standard error is bounded as

$$\begin{aligned} R(\hat{\theta}_{\text{std}} | E_2)P(E_2) &= O(\delta)(1 - \delta)^n \\ &= O(\delta)e^{-\delta n} \\ &= O\left(\delta \cdot \frac{s^7 - 1}{s^7}\right) \\ &= O(\delta) = O\left(\frac{\log(s^7) - \log(s^7 - 1)}{s}\right) = O(1/s) \end{aligned}$$

since  $\log(s^7) - \log(s^7 - 1) \leq 1$  for  $s \geq 2$ . For the complementary event  $E_2^c$ , note that cubic spline predictors can grow only as  $O(t^3)$ , with error at most  $O(t^6)$ . Therefore the standard error for case  $E_2^c$  is bounded as

$$\begin{aligned} R(\hat{\theta}_{\text{std}} | E_2^c)P(E_2^c) &\leq O(t^6)(1 - e^{-\delta n}) \\ &= O(t^6)O\left(\frac{1}{s^7}\right) = O(1/s) \end{aligned}$$

Putting the parts together yields

$$\begin{aligned} R(\hat{\theta}_{\text{std}}) &= R(\hat{\theta}_{\text{std}} | E_2)P(E_2) + R(\hat{\theta}_{\text{std}} | E_2^c)P(E_2^c) \\ &\leq O(1/s) + O(1/s) = O(1/s). \end{aligned}$$

Thus overall,  $R(\hat{\theta}_{\text{std}}) = O(1/s)$  and combining the bounds yields the result.  $\square$

## D. Robust Self-Training

We define the linear robust self-training estimator from Equation (11) and expand all the terms.

$$\begin{aligned} \hat{\theta}_{\text{rst}} &\in \arg \min_{\theta} \left\{ \mathbb{E}_{P_x} [(x^\top \theta_{\text{int-std}} - x^\top \theta)^2] : \right. \\ &\quad X_{\text{std}} \theta = y_{\text{std}}, \max_{x_{\text{adv}} \in T(x)} (x_{\text{adv}}^\top \theta - y)^2 = 0 \forall x, y \in X_{\text{std}}, y_{\text{std}}, \\ &\quad \left. \mathbb{E}_{P_x} \left[ \max_{x_{\text{adv}} \in T(x)} (x_{\text{adv}}^\top \theta - x^\top \theta)^2 \right] = 0 \right\}. \end{aligned} \quad (30)$$

Notice that for unlabeled components of the estimator, we assume access to the data distribution  $P_x$  and thus optimize the population quantities.

As we show in the next subsection, we can rewrite the robust self-training estimator into the following reduced form, more directly connecting to the general analysis of adding extra data  $X_{\text{ext}}$  in min-norm linear regression.

$$\hat{\theta}_{\text{rst}} \in \arg \min_{\theta} \left\{ (\theta - \theta_{\text{int-std}})^\top \Sigma (\theta - \theta_{\text{int-std}}) : X_{\text{std}} \theta = y_{\text{std}}, X_{\text{ext}} \theta = 0 \right\} \quad (31)$$

for the appropriate choice of  $X_{\text{ext}}$ , as shown in Section D.1. Here, we can interpret  $X_{\text{ext}}$  as the difference between the perturbed inputs and original inputs. These are perturbations which we want the model to be invariant to, and hence output zero.

### D.1. Robust self-training algorithm in linear regression

We give an algorithm for constructing  $X_{\text{ext}}$  which enforces the population robustness constraints. Suppose we are given  $\Sigma$ , the population covariance of  $P_x$ . In robust self-training, we enforce that the model is consistent over perturbations of the labeled data  $X_{\text{std}}$  and (infinite) unlabeled data. To do this, we add linear constraints of the form  $x_{\text{adv}}^\top \theta - x^\top \theta = 0$ , where  $x_{\text{adv}} \in T(x)$  for all  $x$ . We can view these linear constraints as augmenting the dataset with input-target pairs  $(x_{\text{ext}}, 0)$  where  $x_{\text{ext}} = x_{\text{adv}} - x$ . By assumption,  $x_{\text{ext}}^\top \theta^* = 0$  so these augmentations fit into our data augmentation framework.

However, when we enforce these constraints over the entire population  $P_x$  or when there are an infinite number of transformations in  $T(x)$ , a naive implementation requires augmenting with infinitely many points. Noting that the space of

augmentations  $x_{\text{ext}}$  satisfying  $x_{\text{ext}}^\top \theta^* = 0$  is a linear subspace, we can instead summarize the augmentations with a basis that spans the transformations. Let the space of perturbations be  $\mathcal{T} = \cup_{x \in \text{supp}(P_x), x_{\text{adv}} \in T(x)} x_{\text{adv}} - x$ . Note that this space of perturbations also contains perturbations of the original data  $X_{\text{std}}$  if  $X_{\text{std}}$  is in the support of  $P_x$ . If  $X_{\text{std}}$  is not in the support of  $P_x$ , the behavior of the estimator on these points do not affect standard or robust error. Assuming that we can efficiently optimize over  $\mathcal{T}$ , we construct the basis by an iterative procedure reminiscent of adversarial training.

1. Set  $t = 0$ . Initialize  $\theta^t = \theta_{\text{int-std}}$  and  $(X_{\text{ext}})_0$  as an empty matrix.
2. At iteration  $t$ , solve for  $x_{\text{ext}}^t = \arg \max_{x_{\text{ext}} \in \mathcal{T}} (x_{\text{ext}}^\top \theta^t)^2$ . If the objective is unbounded, choose any  $x_{\text{ext}}^t$  such that  $x_{\text{ext}}^\top \theta^t \neq 0$ .
3. If  $\theta^t \top x_{\text{ext}}^t = 0$ , stop and return  $(X_{\text{ext}})_t$ .
4. Otherwise, add  $x_{\text{ext}}^t$  as a row in  $(X_{\text{ext}})_t$ . Increment  $t$  and let  $\theta^t$  solve (31) with  $X_{\text{ext}} = (X_{\text{ext}})_t$ .
5. Return to step 2.

In each iteration, we search for a perturbation that the current  $\theta^t$  is not invariant to. If we can find such a perturbation, we add it to the constraint set in  $(X_{\text{ext}})_t$ . We stop when we cannot find such a perturbation, implying that the rows of  $(X_{\text{ext}})_t$  and  $X_{\text{std}}$  span  $\mathcal{T}$ . The final RST estimator solves (31) using  $X_{\text{ext}}$  returned from this procedure.

This procedure terminates within  $O(d)$  iterations. To see this, note that  $\theta^t$  is orthogonal to all rows of  $(X_{\text{ext}})_t$ . Any vector in the span of  $(X_{\text{ext}})_t$  is orthogonal to  $\theta^t$ . Thus, if  $\theta^t \top x_{\text{ext}}^t \neq 0$ , then  $x_{\text{ext}}^t$  must not be in the span of  $(X_{\text{ext}})_t$ . At most  $d - \text{rank}(X_{\text{std}})$  such new directions can be added until  $(X_{\text{ext}})_t$  is full rank. When  $(X_{\text{ext}})_t$  is full rank,  $\theta^t \top x_{\text{ext}}^t = 0$  must hold and the algorithm terminates.

## D.2. Proof of Theorem 2

In this section, we prove Theorem 2, which we reproduce here.

**Theorem 2.** *Assume the noiseless linear model  $y = x^\top \theta^*$ . Let  $\theta_{\text{int-std}}$  be an arbitrary interpolant of the standard data, i.e.  $X_{\text{std}} \theta_{\text{int-std}} = y_{\text{std}}$ . Then*

$$L_{\text{std}}(\hat{\theta}_{\text{rst}}) \leq L_{\text{std}}(\theta_{\text{int-std}}).$$

Simultaneously,  $L_{\text{rob}}(\hat{\theta}_{\text{rst}}) = L_{\text{std}}(\hat{\theta}_{\text{rst}})$ .

*Proof.* We work with the RST estimator in the form from Equation (31). We note that our result applies generally to any extra data  $X_{\text{ext}}, y_{\text{ext}}$ . We define  $\Sigma_{\text{std}} = X_{\text{std}}^\top X_{\text{std}}$ . Let  $\{u_i\}$  be an orthonormal basis of the kernel  $\text{Null}(\Sigma_{\text{std}} + X_{\text{ext}}^\top X_{\text{ext}})$  and  $\{v_i\}$  be an orthonormal basis for  $\text{Null}(\Sigma_{\text{std}}) \setminus \text{span}(\{u_i\})$ . Let  $U$  and  $V$  be the linear operators defined by  $Uw = \sum_i u_i w_i$  and  $Vw = \sum_i v_i w_i$ , respectively, noting that  $U^\top V = 0$ . Defining  $\Pi_{\text{std}}^\perp := (I - \Sigma_{\text{std}}^\dagger \Sigma_{\text{std}})$  to be the projection onto the null space of  $X_{\text{std}}$ , we see that there are unique vectors  $\rho, \alpha$  such that

$$\theta^* = (I - \Pi_{\text{std}}^\perp) \theta^* + U\rho + V\alpha. \quad (32a)$$

As  $\theta_{\text{int-std}}$  interpolates the standard data, we also have

$$\theta_{\text{int-std}} = (I - \Pi_{\text{std}}^\perp) \theta^* + Uw + Vz, \quad (32b)$$

as  $X_{\text{std}} U w = X_{\text{std}} V z = 0$ , and finally,

$$\hat{\theta}_{\text{rst}} = (I - \Pi_{\text{std}}^\perp) \theta^* + U\rho + V\lambda \quad (32c)$$

where we note the common  $\rho$  between Eqs. (32a) and (32c).

Using the representations (32) we may provide an alternative formulation for the augmented estimator (30), using this to prove the theorem. Indeed, writing  $\theta_{\text{int-std}} - \hat{\theta}_{\text{rst}} = U(w - \rho) + V(z - \lambda)$ , we immediately have that the estimator has the form (32c), with the choice

$$\lambda = \arg \min_{\lambda} \left\{ (U(w - \rho) + V(z - \lambda))^\top \Sigma (U(w - \rho) + V(z - \lambda)) \right\}.$$

The optimality conditions for this quadratic imply that

$$V^\top \Sigma V(\lambda - z) = V^\top \Sigma U(w - \rho). \quad (33)$$

Now, recall that the standard error of a vector  $\theta$  is  $R(\theta) = (\theta - \theta^*)^\top \Sigma (\theta - \theta^*) = \|\theta - \theta^*\|_\Sigma^2$ , using Mahalanobis norm notation. In particular, a few quadratic expansions yield

$$\begin{aligned} R(\theta_{\text{int-std}}) - R(\hat{\theta}_{\text{rst}}) &= \|U(w - \rho) + Vz - \alpha\|_\Sigma^2 - \|V(\lambda - \alpha)\|_\Sigma^2 \\ &= \|U(w - \rho) + Vz\|_\Sigma^2 + \|V\alpha\|_\Sigma^2 - 2(U(w - \rho) + Vz)^\top \Sigma V\alpha - \|V\lambda\|_\Sigma^2 - \|V\alpha\|_\Sigma^2 + 2(V\lambda)^\top \Sigma V\alpha \\ &\stackrel{(i)}{=} \|U(w - \rho) + Vz\|_\Sigma^2 - 2(V\lambda)^\top \Sigma V\alpha - \|V\lambda\|_\Sigma^2 + 2(V\lambda)^\top V\alpha \\ &= \|U(w - \rho) + Vz\|_\Sigma^2 - \|V\lambda\|_\Sigma^2, \end{aligned} \quad (34)$$

where step (i) used that  $(U(w - \rho))^\top \Sigma V = (V(\lambda - z))^\top \Sigma V$  from the optimality conditions (33).

Finally, we consider the rightmost term in equality (34). Again using the optimality conditions (33), we have

$$\|V\lambda\|_\Sigma^2 = \lambda^\top V^\top \Sigma^{1/2} \Sigma^{1/2} (U(w - \rho) + Vz) \leq \|V\lambda\|_\Sigma \|U(w - \rho) + Vz\|_\Sigma$$

by Cauchy-Schwarz. Revisiting equality (34), we obtain

$$\begin{aligned} R(\theta_{\text{int-std}}) - R(\hat{\theta}_{\text{rst}}) &= \|U(w - \rho) + Vz\|_\Sigma^2 - \frac{\|V\lambda\|_\Sigma^4}{\|V\lambda\|_\Sigma^2} \\ &\geq \|U(w - \rho) + Vz\|_\Sigma^2 - \frac{\|V\lambda\|_\Sigma^2 \|U(w - \rho) + Vz\|_\Sigma^2}{\|V\lambda\|_\Sigma^2} = 0, \end{aligned}$$

as desired.

Finally, we show that  $L_{\text{std}}(\hat{\theta}_{\text{rst}}) = L_{\text{rob}}(\hat{\theta}_{\text{rst}})$ . Here, choose  $X_{\text{ext}}$  to contain at most  $d$  basis vectors which span  $\{x_{\text{adv}} : x_{\text{adv}} \in T(x), \forall x \in \text{supp}(P_x)\}$ . Thus, the robustness constraint  $\mathbb{E}_{P_x}[\max_{x_{\text{adv}} \in T(x)} (x_{\text{adv}}^\top \hat{\theta}_{\text{rst}} - x^\top \hat{\theta}_{\text{rst}})] = 0$  is satisfied by fitting  $X_{\text{ext}}$ . By fitting  $X_{\text{ext}}$ , we thus have  $x_{\text{adv}}^\top \hat{\theta}_{\text{rst}} - x^\top \hat{\theta}_{\text{rst}} = 0$  for all  $x_{\text{adv}} \in T(x)$ ,  $x \in \text{supp}(P_x)$  up to a measure zero set of  $x$ . Thus, the robust error is

$$L_{\text{rob}}(\hat{\theta}_{\text{rst}}) = \mathbb{E}_{P_x}[\max_{x_{\text{adv}} \in T(x)} (x_{\text{adv}}^\top \hat{\theta}_{\text{rst}} - x_{\text{adv}}^\top \theta^*)^2] = \mathbb{E}_{P_x}[(x^\top \hat{\theta}_{\text{rst}} - x^\top \theta)^2] = L_{\text{std}}(\hat{\theta}_{\text{rst}})$$

where we used that  $x_{\text{adv}}^\top \theta^* = x^\top \theta^*$  by assumption. Since  $L_{\text{rob}}(\hat{\theta}_{\text{rst}}) \geq L_{\text{std}}(\hat{\theta}_{\text{rst}})$ ,  $\hat{\theta}_{\text{rst}}$  has perfect consistency, achieving the lowest possible robust error (matching the standard error).  $\square$

### D.3. Different instantiations of the general RST procedure

The general RST estimator (Equation 10) is simply a weighted combination of some standard loss and some robust loss on the labeled and unlabeled data. Throughout, we assume the same notation as that used in the definition of the general estimator.  $X_{\text{std}}, y_{\text{std}}$  denote the standard training set and we have access to  $m$  unlabeled points  $\tilde{x}_i, i = 1, \dots, m$ .

#### D.3.1. PROJECTED GRADIENT ADVERSARIAL TRAINING

In the first variant, RST + PG-AT, we use multiclass logistic loss (cross-entropy) as the standard loss. The robust loss is the maximum cross-entropy loss between any perturbed input (within the set of transformations  $T(\cdot)$ ) and the label (pseudo-label in the case of unlabeled data). We set the weights such that the estimator can be written as follows.

$$\begin{aligned} \hat{\theta}_{\text{rst+pg-at}} := \arg \min_{\theta} & \left\{ \frac{1 - \lambda}{n} \sum_{(x, y) \in [X_{\text{std}}, y_{\text{std}}]} (1 - \beta) \ell(f_\theta(x), y) + \beta \ell(f_\theta(x_{\text{adv}}), y) \right. \\ & \left. + \frac{\lambda}{m} \sum_{i=1}^m (1 - \beta) \ell(f_\theta(\tilde{x}_i), f_{\hat{\theta}_{\text{std}}}(\tilde{x}_i)) + \beta \ell(f_\theta(\tilde{x}_{\text{adv}i}), f_{\hat{\theta}_{\text{std}}}(\tilde{x}_i)) \right\}, \end{aligned} \quad (35)$$

In practice,  $x_{\text{adv}}$  is found by performing a few steps of projected gradient method on  $\ell(f_\theta(x), y)$ , and similarly  $\tilde{x}_{\text{adv}}$  by performing a few steps of projected gradient method on  $\ell(f_\theta(\tilde{x}), f_{\hat{\theta}_{\text{std}}}(\tilde{x}))$ .

### D.3.2. TRADES

TRADES (Zhang et al., 2019) was proposed as a modification of the projected gradient adversarial training algorithm of (Madry et al., 2018). The robust loss is defined slightly differently—it operates on the normalized logits, which can be thought of as probabilities of different labels. The TRADES loss minimizes the maximum KL divergence between the probability over labels for input  $x$  and a perturbed input  $\tilde{x} \in T(x)$ . Setting the weights of the different loss of the general RST estimator (10) similar to RST+PG-AT above gives the following estimator.

$$\hat{\theta}_{\text{rst+trades}} := \arg \min_{\theta} \left\{ \frac{(1-\lambda)}{n} \sum_{(x,y) \in [X_{\text{std}}, y_{\text{std}}]} \ell(f_{\theta}(x), y) + \beta KL(p_{\theta}(x_{\text{adv}}) || p_{\theta}(x)) + \frac{\lambda}{m} \sum_{i=1}^m \ell(f_{\theta}(\tilde{x}_i), f_{\hat{\theta}_{\text{std}}}(\tilde{x}_i)) + \beta KL(p_{\theta}(\tilde{x}_{\text{adv}_i}) || p_{\hat{\theta}_{\text{std}}}(\tilde{x}_i)) \right\}. \quad (36)$$

In practice,  $x_{\text{adv}}$  and  $\tilde{x}_{\text{adv}}$  are obtained by performing a few steps of projected gradient method on the respective KL divergence terms.

## E. Experimental Details

### E.1. Spline simulations

For spline simulations in Figure 2 and Figure 1, we implement the optimization of the standard and robust objectives using the basis described in (Friedman et al., 2001). The penalty matrix  $M$  computes second-order finite differences of the parameters  $\theta$ . We solve the min-norm objective directly using CVXPY (Diamond & Boyd, 2016). Each point in Figure 1(a) represents the average standard error over 25 trials of randomly sampled training datasets between 22 and 1000 samples. Shaded regions represent 1 standard deviation.

### E.2. RST experiments

We evaluate the performance of RST applied to  $\ell_{\infty}$  adversarial perturbations, adversarial rotations, and random rotations.

#### E.2.1. SUBSAMPLING CIFAR-10

We augment with  $\ell_{\infty}$  adversarial perturbations of various sizes. In each epoch, we find the augmented examples via Projected Gradient Ascent on the multiclass logistic loss (cross-entropy loss) of the incorrect class. Training the augmented estimator in this setup uses essentially the adversarial training procedure of (Madry et al., 2018), with equal weight on both the “clean” and adversarial examples during training.

We compare the standard error of the augmented estimator with an estimator trained using RST. We apply RST to adversarial training algorithms in CIFAR-10 using 500k unlabeled examples sourced from Tiny Images, as in (Carmon et al., 2019).

We use Wide ResNet 40-2 models (Zagoruyko & Komodakis, 2016) while varying the number of samples in CIFAR-10. We sub-sample CIFAR-10 by factors of  $\{1, 2, 5, 8, 10, 20, 40\}$  in Figure 1(a) and  $\{1, 2, 5, 8, 10\}$  in Figure 1(b). We report results averaged from 2 trials for each sub-sample factor. All models are trained for 200 epochs with respect to the size of the labeled training dataset and all achieve almost 100% standard and robust training accuracy.

We evaluate the robustness of models to the strong PGD-attack with 40 steps and 5 restarts. In Figure 1(b), we used a simple heuristic to set the regularization strength on unlabeled data  $\lambda$  in Equation (35) to be  $\lambda = \min(0.9, p)$  where  $p \in [0, 1]$  is the fraction of the original CIFAR-10 dataset sampled. We set  $\beta = 0.5$ . Intuitively, we give more weight to the unlabeled data when the original dataset is larger, meaning that the standard estimator produces more accurate pseudo-labels.

Figure 9 shows that the robust accuracy of the RST model improves about 5-15% percentage points above the robust model (trained using PGD adversarial training) for all subsamples, including the full dataset (Tables 2,3).

We use a smaller model due to computational constraints enforced by adversarial training. Since the model is small, we could only fit adversarially augmented examples with small  $\epsilon = 2/255$ , while existing baselines use  $\epsilon = 8/255$ . Note that even for  $\epsilon = 2/255$ , adversarial data augmentation leads to an increase in standard error. We show that RST can fix this. While ensuring models are robust is an important goal in itself, in this work, we view adversarial training through the lens of covariate-shifted data augmentation and study how to use augmented data without increasing standard error. We show that

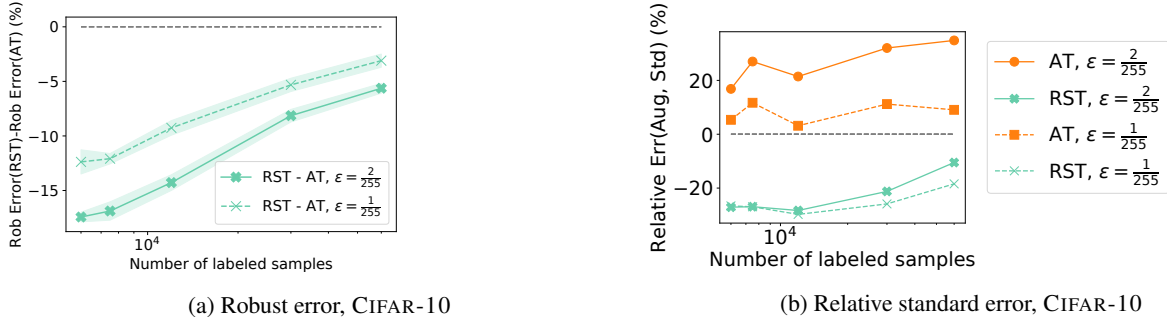

Figure 9. (a) Difference in robust error between the RST adversarial training model and the vanilla adversarial training (AT) model for CIFAR-10. RST improves upon the robust error of the AT model by approximately a 15% percentage point increase for small subsamples and 5% percentage point increase for larger subsamples of CIFAR-10. (b) Relative difference in standard error between augmented estimators (the RST model and the AT model) and the standard estimator on CIFAR-10. We achieve up to 20% better standard error than the standard model for small subsamples.

|                                   | Standard | AT     | RST+AT        |
|-----------------------------------|----------|--------|---------------|
| Standard Acc                      | 94.63%   | 94.15% | <b>95.58%</b> |
| Robust Acc ( $\epsilon = 1/255$ ) | -        | 85.59% | <b>88.74%</b> |

Table 2. Test accuracies for the standard, vanilla adversarial training (AT), and AT with RST for  $\epsilon = 1/255$  on the full CIFAR-10 dataset. Accuracies are averaged over two trials. The robust accuracy of the standard model is near 0%.

RST preserves the other benefits of some kinds of data augmentation like increased robustness to adversarial examples.

### E.2.2. $\ell_\infty$ ADVERSARIAL PERTURBATIONS

In Table 1, we evaluate RST applied to PGD and TRADES adversarial training. The models are trained on the full CIFAR-10 dataset, and models which use unlabeled data (self-training and RST) also use 500k unlabeled examples from Tiny Images. All models except the Interpolated AT and Neural Architecture Search model use the same base model WideResNet 28-10. To evaluate robust accuracy, we use a strong PGD-attack with 40 steps and 5 restarts against  $\ell_\infty$  perturbations of size  $8/255$ . For RST models, we set  $\beta = 0.5$  in Equation (35) and Equation (36), following the heuristic  $\lambda = \min(0.9, p)$  with  $p = 1$  since we use the entire labeled trainign set. We train for 200 epochs such that 100% training standard accuracy is attained.

### E.2.3. ADVERSARIAL AND RANDOM ROTATION/TRANSLATIONS

In Table 1 (right), we use RST for adversarial and random rotation/translations, denoting these transformations as  $x_{adv}$  in Equation (35). The attack model is a grid of rotations of up to 30 degrees and translations of up to  $\sim 10\%$  of the image size. The grid consists of 31 linearly spaced rotations and 5 linearly spaced translations in both dimensions. The Worst-of-10 model samples 10 uniformly random transformations of each input and augment with the one where the model performs the worst (causes an incorrect prediction, if it exists). The Random model samples 1 random transformation as the augmented input. All models (besides cited models) use the WRN-40-2 architecture and are trained for 200 epochs. We use the same hyperparameters  $\lambda, \beta$  as in E.2.2 for Equation (35).

## F. Comparison to standard self-training algorithms

The main objective of RST is to allow to perform robust training without sacrificing standard accuracy. This is done by regularizing an augmented estimator to provide labels close to a standard estimator on the unlabeled data. This is closely related to but different two broad kinds of semi-supervised learning.

1. Self-training (pseudo-labeling): Classical self-training does not deal with data augmentation or robustness. We view RST as a generalization of self-training in the context of data augmentations. Here the pseudolabels are generated by a standard non-augmented estimator that is *not* trained on the labeled augmented points. In contrast, standard

|                                   | Standard | AT     | RST+AT        |
|-----------------------------------|----------|--------|---------------|
| Standard Acc                      | 94.63%   | 92.69% | <b>95.15%</b> |
| Robust Acc ( $\epsilon = 2/255$ ) | -        | 77.87% | <b>83.50%</b> |

Table 3. Test accuracies for the standard, vanilla adversarial training (AT), and AT with RST for  $\epsilon = 2/255$  on the full CIFAR-10 dataset. Accuracies are averaged over two trials. The robust test accuracy of the standard model is near 0%.

self-training would just use all labeled data to generate pseudo-labels. However, since some augmentations cause a drop in standard accuracy, and hence this would generate worse pseudo-labels than RST.

2. Robust consistency training: Another popular semi-supervised learning strategy is based on enforcing consistency in a model’s predictions across various perturbations of the unlabeled data (Miyato et al., 2018; Xie et al., 2019; Sajjadi et al., 2016; Laine & Aila, 2017)). RST is similar in spirit, but has an additional crucial component. We generate pseudo-labels first by performing standard training, and rather than enforcing simply consistency across perturbations, RST enforces that the unlabeled data and perturbations are matched with the pseudo-labels generated.

## G. Minimum $\ell_1$ -norm problem where data augmentation hurts standard error

We present a problem where data augmentation increases standard error for minimum  $\ell_1$ -norm estimators, showing that the phenomenon is not special to minimum Mahalanobis norm estimators.

### G.1. Setup in 3 dimensions

Define the minimum  $\ell_1$ -norm estimators

$$\begin{aligned}\hat{\theta}_{\text{std}} &= \arg \min_{\theta} \left\{ \|\theta\|_1 : X_{\text{std}}\theta = y_{\text{std}} \right\} \\ \hat{\theta}_{\text{aug}} &= \arg \min_{\theta} \left\{ \|\theta\|_1 : X_{\text{std}}\theta = y_{\text{std}}, X_{\text{ext}}\theta = y_{\text{ext}} \right\}.\end{aligned}$$

We begin with a 3-dimensional construction and then increase the number of dimensions. Let the domain of possible values be  $\mathcal{X} = \{\mathbf{x}_1, \mathbf{x}_2, \mathbf{x}_3\}$  where

$$\mathbf{x}_1 = [1 + \delta, 1, 0], \quad \mathbf{x}_2 = [0, 1, 1 + \delta], \quad \mathbf{x}_3 = [1 + \delta, 0, 1].$$

Define the data distribution through the generative process for the random feature vector  $\mathbf{x}$

$$\mathbf{x} = \begin{cases} \mathbf{x}_1 & \text{w.p. } 1 - p \\ \mathbf{x}_2 & \text{w.p. } \epsilon \\ \mathbf{x}_3 & \text{w.p. } p - \epsilon \end{cases}$$

where  $0 < \delta < 1$  and  $\epsilon > 0$ . Define the optimal linear predictor  $\theta^* = \mathbf{1}$  to be the all-ones vector, such that in all cases,  $\mathbf{x}^\top \theta^* = 2 + \delta$ . We define the consistent perturbations as

$$T(x) = \begin{cases} \{\mathbf{x}_1, \mathbf{x}_2\} & x \in \{\mathbf{x}_1, \mathbf{x}_2\} \\ \{\mathbf{x}_3\} & \text{o.w.} \end{cases}$$

The augmented estimator will add all possible consistent perturbations of the training set as extra data  $X_{\text{ext}}$ . For example, if  $\mathbf{x}_1$  is in the training set, then the augmented estimator will add  $\mathbf{x}_2$  as extra data since  $\mathbf{x}_2 \in T(\mathbf{x}_1)$ . The standard error is measured by mean squared error.

We give some intuition for how augmentation can hurt standard error in this 3-dimensional example. Define  $E_1$  to be the event that we draw  $n$  samples with value  $\mathbf{x}_1$ . Given  $E_1$ , the standard and augmented estimators are

$$\hat{\theta}_{\text{std}} = \left[ \frac{2 + \delta}{1 + \delta}, 0, 0 \right], \quad \hat{\theta}_{\text{aug}} = [0, 2 + \delta, 0]. \quad (37)$$

Note that the  $\hat{\theta}_{\text{aug}}$  has slightly higher norm ( $\|\hat{\theta}_{\text{aug}}\|_1 = 2 + \delta > \frac{2+\delta}{1+\delta} = \|\hat{\theta}_{\text{std}}\|_1$ ). Since  $\mathbf{x}_3^\top \hat{\theta}_{\text{aug}} = 0$  in this case, the squared error of  $\hat{\theta}_{\text{aug}}$  wrt to  $\mathbf{x}_3$  is  $(\mathbf{x}_3^\top \hat{\theta}_{\text{aug}} - 2 + \delta)^2 = (2 + \delta)^2$ . The standard estimator fits  $\mathbf{x}_3$  perfectly, but has high error on  $\mathbf{x}_2$ . If the probability of  $E_1$  occurring is high and the probability of  $\mathbf{x}_3$  is higher relative to  $\mathbf{x}_2$ , then the  $\hat{\theta}_{\text{aug}}$  will have high standard error relative to  $\hat{\theta}_{\text{std}}$ . Here, due to the inductive bias that minimizes the  $\ell_1$  norm, certain augmentations can cause large changes in the sparsity pattern of the solution, drastically affecting the error. Furthermore, the optimal solution  $\theta^*$  is quite large with respect to the  $\ell_1$  norm, satisfying the conditions of Proposition 1 in spirit and suggesting that the  $\ell_1$  inductive bias (promoting sparsity) is mismatched with the problem.

## G.2. Construction for general $d$

We construct the example by sampling  $\mathbf{x}$  in 3 dimensions and then repeating the vector  $d$  times. In particular, the samples are realizations of the random vector  $[\mathbf{x}; \mathbf{x}; \mathbf{x}; \dots; \mathbf{x}]$  which have dimension  $3d$  and every block of 3 coordinates have the same values. Under this setup, we can show that there is a family of problems such that the difference between standard errors of the augmented and standard estimators grows to infinity as  $d, n \rightarrow \infty$ .

**Theorem 4.** *Let the setting be defined as above, where the dimension  $d$  and number of samples  $n$  are such that  $n/d \rightarrow \gamma$  approaches a constant. Let  $p = 1/d^2$ ,  $\epsilon = 1/d^3$ , and  $\delta$  be a constant. Then the ratio between standard errors of the augmented and standard estimators grows as*

$$\frac{L_{\text{std}}(\hat{\theta}_{\text{aug}})}{L_{\text{std}}(\hat{\theta}_{\text{std}})} = \Omega(d) \quad (38)$$

as  $d, n \rightarrow \infty$ .

*Proof.* We define an event where the augmented estimator has high error relative to the standard estimator and bound the ratio between the standard errors of the standard and augmented estimators given this event. Define  $E_1$  as the event that we have  $n$  samples where all samples are  $[\mathbf{x}_1; \mathbf{x}_1; \dots; \mathbf{x}_1]$ . The standard and augmented estimators are the corresponding repeated versions

$$\hat{\theta}_{\text{std}} = \left[ \frac{2 + \delta}{1 + \delta}, 0, 0, \dots, \frac{2 + \delta}{1 + \delta}, 0, 0 \right], \quad \hat{\theta}_{\text{aug}} = [0, 2 + \delta, 0, \dots, 0, 2 + \delta, 0]. \quad (39)$$

The event  $E_1$  occurs with probability  $(1 - p)^n + (p - \epsilon)^n$ . It is straightforward to verify that the respective standard errors are

$$L_{\text{std}}(\hat{\theta}_{\text{std}} | E_1) = \epsilon d^2 (2 + \delta)^2, \quad L_{\text{std}}(\hat{\theta}_{\text{aug}} | E_1) = (p - \epsilon) d^2 (2 + \delta)^2$$

and that the ratio between standard errors is

$$\frac{L_{\text{std}}(\hat{\theta}_{\text{aug}} | E_1)}{L_{\text{std}}(\hat{\theta}_{\text{std}} | E_1)} = \frac{p - \epsilon}{\epsilon}.$$

The ratio between standard errors is bounded by

$$\begin{aligned} \frac{L_{\text{std}}(\hat{\theta}_{\text{aug}})}{L_{\text{std}}(\hat{\theta}_{\text{std}})} &= \sum_{E \in \{E_1, E_1^c\}} P(E) \frac{L_{\text{std}}(\hat{\theta}_{\text{aug}} | E)}{L_{\text{std}}(\hat{\theta}_{\text{std}} | E)} \\ &> P(E_1) \frac{L_{\text{std}}(\hat{\theta}_{\text{aug}} | E_1)}{L_{\text{std}}(\hat{\theta}_{\text{std}} | E_1)} \\ &= ((1 - p)^n + (p - \epsilon)^n) \left( \frac{p - \epsilon}{\epsilon} \right) \\ &> (1 - p)^n (d - 1) \\ &\geq \left( 1 - \frac{n}{d^3} \right) (d - 1) \\ &= d - \frac{n}{d^2} - 1 + \frac{n}{d^3} = \Omega(d) \end{aligned}$$

as  $n, d \rightarrow \infty$ , where we used Bernoulli's inequality in the second to last step.  $\square$
